# Supplementary material for: Subspecialty-Specific Foundation Model for Intelligent Gastrointestinal Pathology
Source: Research Square preprint supplement (doi:10.21203/rs.3.rs-6836189/v1), 2025-06-23
Supplement: Supplementary file 1 [file a39920682dfe823179fd1d26.docx]

| Cohort | Esophagus | Stomach | Intestine | Total |
| --- | --- | --- | --- | --- |
| ZN | 8,625 | 66,053 | 68,692 | 143,370 |
| LZ | 2,165 | 26,951 | 23,676 | 52,792 |
| FJ | 714 | 8,682 | 4,485 | 13,881 |
| Total | 11,504 | 101,686 | 96,853 | 210,043 |

**Supplementary Table 1**: Pre-training dataset that consists of 353,478,334 patches from 210,043 diagnostic whole-slide images (WSIs) across three major tissue types collected from Zhongnan Hospital of Wuhan University (ZN), Liuzhou People’s Hospital (LZ), and Fuzhou University Affiliated Provincial Hospital (FJ).

| Cohort | Esophagus | Stomach | Intestine | Total |
| --- | --- | --- | --- | --- |
| ZN | 12,789 | 24,719 | 25,596 | 63,104 |
| LZ | 7,290 | 64,143 | 17,178 | 88,611 |
| FJ | 9,672 | 35,914 | 4,550 | 50,136 |
| Total | 29,751 | 124,776 | 47,324 | 201,851 |

**Supplementary Table 2**: 201,851 annotated tumor regions of interest (ROI) from 26,320 WSIs across three major tissue types collected from ZN, LZ, and FJ to train a tumor classifier.

| Cohort | Esophagus | Stomach | Intestine | Total |
| --- | --- | --- | --- | --- |
| ZN | 21,834 | 42,236 | 43,795 | 107,865 |
| LZ | 11,947 | 105,430 | 28,229 | 145,606 |
| FJ | 3,117 | 11,535 | 1,469 | 16,121 |
| Total | 36,898 | 159,201 | 73,493 | 269,592 |

**Supplementary Table 3**: 269,592 annotated non-tumor regions of interest (ROI) from 26,320 WSIs across three major tissue types collected from ZN, LZ, and FJ to train a tumor classifier.

| Cohort | Esophagus | Stomach | Intestine | Total |
| --- | --- | --- | --- | --- |
| ZN | 67,696 | 246,912 | 567,312 | 881,920 |
| LZ | 18,928 | 31,792 | 193,248 | 259,968 |
| FJ | 8,064 | 25,104 | 34,272 | 163,440 |
| Total | 94,688 | 415,808 | 794,832 | 1,305,328 |

**Supplementary Table 4**: 1,305,328 ROIs predicted as tumor from 210,043 WSIs across three major tissue types collected from ZN, LZ, and FJ.

| Dataset | Digepath-Stage1 | Digepath-Stage2 |
| --- | --- | --- |
| MSI | 0.8792±0.01284 | 0.8841±0.01774 |
| STM-TNM | 0.6367±0.04628 | 0.6846±0.05407 |
| BOW-TNM | 0.6067±0.01360 | 0.6424±0.03525 |
| ESO-AS | 0.9550±0.04544 | 0.9907±0.01852 |
| ESO-2cls | 0.9620±0.01678 | 0.9960±0.007407 |
| RX | 0.9771±0.01428 | 0.9922±0.01035 |
| PD-L1 | 0.6757±0.03439 | 0.7483±0.09522 |
| LHN-3cls | 0.8179±0.03365 | 0.8852±0.09704 |

**Supplementary Data Table 5**: Comparison (Balanced accuracy) of Digepath-Stage1 and Digepath-Stage2 on different datasets.

| Dataset | Digepath-Stage1 | Digepath-Stage2 |
| --- | --- | --- |
| MSI | 0.8902±0.009659 | 0.9015±0.01296 |
| STM-TNM | 0.6154±0.03411 | 0.6941±0.05291 |
| BOW-TNM | 0.5791±0.01480 | 0.6346±0.02138 |
| ESO-AS | 0.9718±0.02711 | 0.9917±0.01652 |
| ESO-2cls | 0.9621±0.01664 | 0.9960±0.007026 |
| RX | 0.9771±0.01470 | 0.9923±0.01026 |
| PD-L1 | 0.7024±0.03138 | 0.7773±0.09245 |
| LHN-3cls | 0.8315±0.03301 | 0.8900±0.0922 |

**Supplementary Data Table 6**: Comparison (weighted F1 score) of Digepath-Stage1 and Digepath-Stage2 on different datasets.

| Dataset | Digepath-Stage1 | Digepath-Stage2 |
| --- | --- | --- |
| MSI | 0.9394±0.01213 | 0.9507±0.01367 |
| STM-TNM | 0.8201±0.04129 | 0.8599±0.03410 |
| BOW-TNM | 0.8080±0.009132 | 0.8341±0.02441 |
| ESO-AS | 0.9891±0.01635 | 0.9992±0.001646 |
| ESO-2cls | 0.9923±0.004129 | 0.9996±0.0007133 |
| RX | 0.9957±0.006596 | 0.9934±0.009285 |
| PD-L1 | 0.7435±0.03981 | 0.7920±0.08288 |
| LHN-3cls | 0.9324±0.02082 | 0.9643±0.02949 |

**Supplementary Data Table 7**: Comparison (AUROC) of Digepath-Stage1 and Digepath-Stage2 on different datasets.

| Encoder | Balanced ACC | Weighted F1 |
| --- | --- | --- |
| Ctranspath | 0.8222±0.006980 | 0.8408±0.007311 |
| UNI | 0.8978±0.005341 | 0.8998±0.005721 |
| Gigapath | 0.9024±0.005660 | 0.9069±0.005654 |
| Conch-V1.5 | 0.7544±0.007602 | 0.7712±0.007988 |
| Digepath | 0.9321±0.004615 | 0.9320±0.004539 |

**Supplementary Data Table 8**: Supervised gastric epithelial neoplasia and hyperplasia classification (STLC) at 224 × 224 resolution. Pre-extracted patch features from each encoder were trained and evaluated using Linear-probe. The dataset was divided into training and test sets (8014:3435 ROIs). Performance on the test set was assessed using balanced accuracy and weighted F1 score.

| Encoder | Balanced ACC | Weighted F1 |
| --- | --- | --- |
| Ctranspath | 0.8755±0.006259 | 0.8847±0.006141 |
| UNI | 0.9307±0.004727 | 0.9345±0.004943 |
| Gigapath | 0.9357±0.004505 | 0.9365±0.004584 |
| Conch-V1.5 | 0.8246±0.006934 | 0.8349±0.006564 |
| Digepath | 0.9492±0.004183 | 0.9479±0.004069 |

**Supplementary Data Table 9**: Supervised gastric epithelial neoplasia and hyperplasia classification (STLC) at 448 × 448 resolution. Pre-extracted patch features from each encoder were trained and evaluated using Linear-probe. The dataset was divided into training and test sets (8014:3435 ROIs). Performance on the test set was assessed using balanced accuracy and weighted F1 score.

| Encoder | Balanced ACC | Weighted F1 |
| --- | --- | --- |
| Ctranspath | 0.8860±0.005776 | 0.8937±0.006121 |
| UNI | 0.9435±0.004151 | 0.9418±0.004441 |
| Gigapath | 0.9477±0.004236 | 0.9468±0.004272 |
| Conch-V1.5 | 0.8617±0.006227 | 0.8653±0.006415 |
| Digepath | 0.9546±0.003809 | 0.9534±0.003810 |

**Supplementary Data Table 10**: Supervised gastric epithelial neoplasia and hyperplasia classification (STLC) at 672 × 672 resolution. Pre-extracted patch features from each encoder were trained and evaluated using Linear-probe. The dataset was divided into training and test sets (8014:3435 ROIs). Performance on the test set was assessed using balanced accuracy and weighted F1 score.

| Encoder | Balanced ACC | Weighted F1 |
| --- | --- | --- |
| Ctranspath | 0.8858±0.006109 | 0.8963±0.006037 |
| UNI | 0.9495±0.004096 | 0.9474±0.003920 |
| Gigapath | 0.9459±0.004265 | 0.9452±0.004260 |
| Conch-V1.5 | 0.8597±0.006125 | 0.8656±0.006082 |
| Digepath | 0.9519±0.003939 | 0.9506±0.004103 |

**Supplementary Data Table 11**: Supervised gastric epithelial neoplasia and hyperplasia classification (STLC) at 896 × 896 resolution. Pre-extracted patch features from each encoder were trained and evaluated using Linear-probe. The dataset was divided into training and test sets (8014:3435 ROIs). Performance on the test set was assessed using balanced accuracy and weighted F1 score.

| Encoder | Balanced ACC | Weighted F1 |
| --- | --- | --- |
| Ctranspath | 0.8833±0.006321 | 0.8940±0.006077 |
| UNI | 0.9484±0.004039 | 0.9482±0.004225 |
| Gigapath | 0.9527±0.003828 | 0.9528±0.003945 |
| Conch-V1.5 | 0.8589±0.006452 | 0.8667±0.006351 |
| Digepath | 0.9522±0.004126 | 0.9515±0.004121 |

**Supplementary Data Table 12**: Supervised gastric epithelial neoplasia and hyperplasia classification (STLC) at 1120 × 1120 resolution. Pre-extracted patch features from each encoder were trained and evaluated using Linear-probe. The dataset was divided into training and test sets (8014:3435 ROIs). Performance on the test set was assessed using balanced accuracy and weighted F1 score.

| Encoder | Balanced ACC | Weighted F1 |
| --- | --- | --- |
| Ctranspath | 0.8893±0.005730 | 0.8981±0.005783 |
| UNI | 0.9588±0.003828 | 0.9584±0.003868 |
| Gigapath | 0.9576±0.003706 | 0.9583±0.003732 |
| Conch-V1.5 | 0.8842±0.005971 | 0.8904±0.005650 |
| Digepath | 0.9631±0.003504 | 0.9613±0.003494 |

**Supplementary Data Table 13**: Supervised gastric epithelial neoplasia and hyperplasia classification (STLC) using mean-pooling at different resolutions. Pre-extracted patch features from each encoder were trained and evaluated using Linear-probe. The dataset was divided into training and test sets (8014:3435 ROIs). Performance on the test set was assessed using balanced accuracy and weighted F1 score.

| Encoder | Balanced ACC | Weighted F1 | AUROC |
| --- | --- | --- | --- |
| Ctranspath | 0.8801±0.05481 | 0.8866±0.05638 | 0.9719±0.01632 |
| UNI | 0.9082±0.05664 | 0.9076±0.05598 | 0.9759±0.02550 |
| Gigapath | 0.9284±0.05024 | 0.9281±0.04958 | 0.9814±0.0179 |
| Conch-V1.5 | 0.8983±0.04682 | 0.9021±0.04684 | 0.9783±0.01628 |
| Digepath | 0.9467±0.07652 | 0.9471±0.07456 | 0.9778±0.02838 |

**Supplementary Table 14**: Weakly-supervised chronic gastritis grading (CGS-G). Pre-extracted patch features from each encoder were trained and evaluated using ABMIL. The dataset was divided into training, validation, and test sets (319:80:100 WSIs). Performance on the test set was assessed using balanced accuracy, weighted F1 score, and AUROC.

| Encoder | Balanced ACC | Weighted F1 | AUROC |
| --- | --- | --- | --- |
| Ctranspath | 0.8495±0.04848 | 0.8433±0.04720 | 0.9464±0.02668 |
| UNI | 0.8327±0.07518 | 0.8340±0.07306 | 0.9556±0.03260 |
| Gigapath | 0.8786±0.07575 | 0.8706±0.08064 | 0.9482±0.04128 |
| Conch-V1.5 | 0.8078±0.06058 | 0.8024±0.06515 | 0.9377±0.02969 |
| Digepath | 0.8831±0.09661 | 0.8809±0.09787 | 0.9534±0.03807 |

**Supplementary Table 15**: Weakly-supervised acute gastric activity grading (AGS-G). Pre-extracted patch features from each encoder were trained and evaluated using ABMIL. The dataset was divided into training, validation, and test sets (223:56:69 WSIs). Performance on the test set was assessed using balanced accuracy, weighted F1 score, and AUROC.

| Encoder | Balanced ACC | Weighted F1 | AUROC |
| --- | --- | --- | --- |
| Ctranspath | 0.5896±0.01547 | 0.6999±0.05577 | 0.8765±0.02381 |
| UNI | 0.7391±0.07648 | 0.8101±0.07401 | 0.9399±0.03243 |
| Gigapath | 0.7503±0.08180 | 0.7962±0.07459 | 0.9294±0.03724 |
| Conch-V1.5 | 0.7063±0.04715 | 0.7808±0.01652 | 0.9379±0.009378 |
| Digepath | 0.7644±0.1251 | 0.8214±0.09847 | 0.93±0.03961 |

**Supplementary Table 16**: Weakly-supervised intestinal metaplasia grading (IM-G). Pre-extracted patch features from each encoder were trained and evaluated using ABMIL. The dataset was divided into training, validation, and test sets (426:107:134 WSIs). Performance on the test set was assessed using balanced accuracy, weighted F1 score, and AUROC.

| Encoder | Balanced ACC | Weighted F1 | AUROC |
| --- | --- | --- | --- |
| Ctranspath | 0.8009±0.04446 | 0.8143±0.0396 | 0.9002±0.03354 |
| UNI | 0.8144±0.05226 | 0.8304±0.04665 | 0.9172±0.03707 |
| Gigapath | 0.8579±0.05763 | 0.8685±0.05163 | 0.9418±0.03837 |
| Conch-V1.5 | 0.8355±0.04744 | 0.8422±0.0348 | 0.9159±0.04271 |
| Digepath | 0.8606±0.1144 | 0.8678±0.1104 | 0.9356±0.05315 |

**Supplementary Table 17**: Weakly-supervised atrophic gastritis classification (CAG). Pre-extracted patch features from each encoder were trained and evaluated using ABMIL. The dataset was divided into training, validation, and test sets (364:92:115 WSIs). Performance on the test set was assessed using balanced accuracy, weighted F1 score, and AUROC.

| Encoder | Balanced ACC | Weighted F1 |
| --- | --- | --- |
| Ctranspath | 0.8217±0.007014 | 0.8405±0.006965 |
| UNI | 0.8978±0.005761 | 0.8998±0.005810 |
| Gigapath | 0.9026±0.005553 | 0.9072±0.005749 |
| Conch-V1.5 | 0.7544±0.007796 | 0.7712±0.007757 |
| Digepath | 0.9321±0.004784 | 0.9320±0.004789 |

**Supplementary Table 18**: Supervised gastric epithelial neoplasia and hyperplasia classification (STLC). Pre-extracted patch features from each encoder were trained and evaluated using Linear-probe. The dataset was divided into training and test sets (8014:3435 ROIs). Performance on the test set was assessed using balanced accuracy, weighted F1 score, and AUROC.

| Encoder | Balanced ACC | Weighted F1 |
| --- | --- | --- |
| Ctranspath | 0.9438±0.003184 | 0.9615±0.003158 |
| UNI | 0.9435±0.003039 | 0.9575±0.003044 |
| Gigapath | 0.9497±0.002867 | 0.9643±0.003032 |
| Conch-V1.5 | 0.9493±0.003027 | 0.9623±0.002923 |
| Digepath | 0.9524±0.002888 | 0.9685±0.003032 |

**Supplementary Table 19**: Supervised colorectal tissue classification (CRC-100K). Pre-extracted patch features from each encoder were trained and evaluated using Linear-probe. The dataset was divided into training and test sets (100,000:7,180 ROIs). Performance on the test set was assessed using balanced accuracy, weighted F1 score, and AUROC.

| Encoder | Balanced ACC | Weighted F1 |
| --- | --- | --- |
| Ctranspath | 0.6971±0.009943 | 0.7660±0.01009 |
| UNI | 0.8147±0.009682 | 0.8403±0.009868 |
| Gigapath | 0.7949±0.009410 | 0.8202±0.009882 |
| Conch-V1.5 | 0.6771±0.01082 | 0.7325±0.01051 |
| Digepath | 0.8592±0.008587 | 0.8864±0.008687 |

**Supplementary Table 20**: Supervised colorectal polyp classification (UNITOPATHO). Pre-extracted patch features from each encoder were trained and evaluated using Linear-probe. The dataset was divided into training and test sets (6,068:2,601 ROIs). Performance on the test set was assessed using balanced accuracy, weighted F1 score, and AUROC.

| Encoder | Balanced ACC | Weighted F1 |
| --- | --- | --- |
| Ctranspath | 0.8685±0.005042 | 0.8655±0.005076 |
| UNI | 0.9148±0.004158 | 0.9152±0.004223 |
| Gigapath | 0.9056±0.004437 | 0.9059±0.004416 |
| Conch-V1.5 | 0.8715±0.005094 | 0.8700±0.004849 |
| Digepath | 0.9236±0.003925 | 0.9241±0.004038 |

**Supplementary Table 21**: Supervised colorectal adenoma screening (CAMEL). Pre-extracted patch features from each encoder were trained and evaluated using Linear-probe. The dataset was divided into training and test sets (10,782:4,621 ROIs). Performance on the test set was assessed using balanced accuracy, weighted F1 score, and AUROC.

| Encoder | Balanced ACC | Weighted F1 | AUROC |
| --- | --- | --- | --- |
| Ctranspath | 0.7843±0.04563 | 0.8427±0.03437 | 0.9618±0.01721 |
| UNI | 0.7864±0.06374 | 0.8429±0.05205 | 0.9591±0.01685 |
| Gigapath | 0.7786±0.05079 | 0.8387±0.04311 | 0.9547±0.0199 |
| Conch-V1.5 | 0.8013±0.06146 | 0.8486±0.05005 | 0.9589±0.01731 |
| Digepath | 0.8073±0.1012 | 0.8587±0.07551 | 0.9555±0.02368 |

**Supplementary Table 22**: Weakly-supervised colorectal epithelial tumors and proliferative lesion classification (BOW-5cls). Pre-extracted patch features from each encoder were trained and evaluated using ABMIL. The dataset was divided into training, validation and test sets (1,180:169:337 WSIs). Performance on the test set was assessed using balanced accuracy, weighted F1 score, and AUROC.

| Encoder | Balanced ACC | Weighted F1 | AUROC |
| --- | --- | --- | --- |
| Ctranspath | 0.9380±0.003722 | 0.9317±0.003941 | 0.9886±0.0005317 |
| UNI | 0.9445±0.004347 | 0.9342±0.004719 | 0.9883±0.002859 |
| Gigapath | 0.9555±0.003560 | 0.9488±0.004868 | 0.9906±0.001670 |
| Conch-V1.5 | 0.9450±0.002837 | 0.9402±0.002930 | 0.9885±0.001737 |
| Digepath | 0.9460±0.002495 | 0.9370±0.003669 | 0.9880±0.001583 |

**Supplementary Table 23**: Weakly-supervised colorectal epithelial tumors and proliferative lesion classification (IMP-CRS2024). Pre-extracted patch features from each encoder were trained and evaluated using ABMIL. The dataset was divided into training and test sets (1132:900 WSIs). Performance on the test set was assessed using balanced accuracy, weighted F1 score, and AUROC.

| Encoder | Balanced ACC | Weighted F1 | AUROC |
| --- | --- | --- | --- |
| Ctranspath | 0.7254±0.08132 | 0.8411±0.02573 | 0.9508±0.01846 |
| UNI | 0.7753±0.07269 | 0.8888±0.02687 | 0.9568±0.01206 |
| Gigapath | 0.7350±0.08952 | 0.8706±0.03321 | 0.9586±0.01725 |
| Conch-V1.5 | 0.7395±0.08586 | 0.8574±0.03864 | 0.9505±0.01745 |
| Digepath | 0.8041±0.1009 | 0.8923±0.05535 | 0.9553±0.02314 |

**Supplementary Table 24**: Weakly-supervised esophageal epithelial neoplasia classification (ESO-4cls). Pre-extracted patch features from each encoder were trained and evaluated using ABMIL. The dataset was divided into training, validation, and test sets (550:138:172 WSIs). Performance on the test set was assessed using balanced accuracy, weighted F1 score, and AUROC.

| Encoder | Balanced ACC | Weighted F1 | AUROC |
| --- | --- | --- | --- |
| Ctranspath | 0.7225±0.04357 | 0.7203±0.04420 | 0.8026±0.06258 |
| UNI | 0.7518±0.0239 | 0.7499±0.02357 | 0.8170±0.01645 |
| Gigapath | 0.7221±0.04242 | 0.7143±0.04670 | 0.8387±0.03896 |
| Conch-V1.5 | 0.7453±0.03863 | 0.7433±0.03941 | 0.8342±0.05440 |
| Digepath | 0.7875±0.03544 | 0.7852±0.03678 | 0.8722±0.02556 |

**Supplementary Table 25**: Weakly-supervised differentiation between keratinizing and non-keratinizing subtypes of esophageal squamous cell carcinoma (ENSOKRT). Pre-extracted patch features from each encoder were trained and evaluated using ABMIL. The dataset was divided into training, validation, and test sets (216:55:67 WSIs). Performance on the test set was assessed using balanced accuracy, weighted F1 score, and AUROC.

| Encoder | Balanced ACC | Weighted F1 | AUROC |
| --- | --- | --- | --- |
| Ctranspath | 0.9255±0.05091 | 0.9455±0.02340 | 0.9778±0.01804 |
| UNI | 0.9682±0.03721 | 0.9798±0.01767 | 0.9990±0.001437 |
| Gigapath | 0.9862±0.01693 | 0.9940±0.007248 | 0.9997±0.0005291 |
| Conch-V1.5 | 0.9569±0.02348 | 0.9710±0.008414 | 0.9960±0.004151 |
| Digepath | 0.9907±0.01852 | 0.9917±0.01652 | 0.9992±0.001646 |

**Supplementary Table 26**: Weakly-supervised differentiation between esophageal squamous cell carcinoma and adenocarcinoma (ESO-AS). Pre-extracted patch features from each encoder were trained and evaluated using ABMIL. The dataset was divided into training, validation, and test sets (223:56:70 WSIs). Performance on the test set was assessed using balanced accuracy, weighted F1 score, and AUROC.

| Encoder | Balanced ACC | Weighted F1 | AUROC |
| --- | --- | --- | --- |
| Ctranspath | 0.9816±0.002403 | 0.9819±0.002433 | 0.9973±0.001030 |
| UNI | 0.9878±0.001784 | 0.9881±0.001888 | 0.9985±0.0005532 |
| Gigapath | 0.9863±0.002785 | 0.9864±0.002681 | 0.9982±0.0005002 |
| Conch-V1.5 | 0.9840±0.002387 | 0.9840±0.002411 | 0.9981±0.0005626 |
| Digepath | 0.9901±0.003049 | 0.9902±0.002973 | 0.9984±0.0008723 |

**Supplementary Table 27**: Weakly-supervised early gastric cancer screening (STMSCR). Pre-extracted patch features from each encoder were trained and evaluated using ABMIL. The dataset was divided into training, validation, and test sets (167,050:23,864:47,729 ROIs). Performance on the test set was assessed using balanced accuracy, weighted F1 score, and AUROC.

| Encoder | Balanced ACC | Weighted F1 | AUROC |
| --- | --- | --- | --- |
| Ctranspath | 0.9919±0.00191 | 0.9920±0.002082 | 0.9991±0.0003610 |
| UNI | 0.9940±0.005653 | 0.9930±0.006777 | 0.9996±0.0005930 |
| Gigapath | 0.9961±0.0007481 | 0.9965±0.0009239 | 0.9994±0.0004442 |
| Conch-V1.5 | 0.9900±0.003721 | 0.9912±0.004510 | 0.9994±0.0003006 |
| Digepath | 0.9970± 0.001729 | 0.9979±0.002100 | 0.9994±0.0004778 |

**Supplementary Table 28**: Weakly-supervised early colorectal cancer screening (BOWSCR). Pre-extracted patch features from each encoder were trained and evaluated using ABMIL. The dataset was divided into training, validation, and test sets (105,223:15,032:30,063 ROIs). Performance on the test set was assessed using balanced accuracy, weighted F1 score, and AUROC.

| Encoder | Balanced ACC | Weighted F1 | AUROC |
| --- | --- | --- | --- |
| Ctranspath | 0.9499±0.02689 | 0.9496±0.02762 | 0.9939±0.003994 |
| UNI | 0.9767±0.02023 | 0.9766±0.02038 | 0.9969±0.004003 |
| Gigapath | 0.9757±0.01926 | 0.9754±0.01941 | 0.9964±0.003121 |
| Conch-V1.5 | 0.9645±0.01566 | 0.9638±0.01648 | 0.9960±0.004454 |
| Digepath | 0.9963±0.007407 | 0.9960±0.007026 | 0.9996±0.0007133 |

**Supplementary Table 29**: Weakly-supervised early esophageal cancer screening (ESO-2cls). Pre-extracted patch features from each encoder were trained and evaluated using ABMIL. The dataset was divided into training, validation, and test sets (550:138:172 WSIs). Performance on the test set was assessed using balanced accuracy, weighted F1 score, and AUROC.

| Encoder | Mean-Dice | Mean-IoU |
| --- | --- | --- |
| Ctranspath | 0.7123±0.005830 | 0.5845±0.005185 |
| UNI | 0.7924±0.002815 | 0.6813±0.003034 |
| Gigapath | 0.7982±0.003344 | 0.6874±0.004265 |
| Conch-V1.5 | 0.7926±0.0005849 | 0.6798±0.001195 |
| Digepath | 0.8221±0.002733 | 0.7169±0.003528 |

**Supplementary Table 30**: Supervised colorectal gland segmentation (CRAG). Pre-extracted patch features from each encoder were trained and evaluated using TransUnet. The dataset was divided into training and test sets (173:40 ROIs). Performance on the test set was assessed using Mean-Dice and Mean-IoU.

| Encoder | Mean-Dice | Mean-IoU |
| --- | --- | --- |
| Ctranspath | 0.6349±0.0009259 | 0.5628±0.001015 |
| UNI | 0.6959±0.0008948 | 0.6482±0.001024 |
| Gigapath | 0.6960±0.0009924 | 0.6489±0.001129 |
| Conch-V1.5 | 0.6741±0.0009717 | 0.6183±0.0009768 |
| Digepath | 0.7037±0.0002820 | 0.6599±0.0003386 |

**Supplementary Table 31**: Supervised intestinal metaplasia gland segmentation (IM-S). Pre-extracted patch features from each encoder were trained and evaluated using TransUnet. The dataset was divided into training, validation, and test sets (794:114:227 ROIs). Performance on the test set was assessed using Mean-Dice and Mean-IoU.

| Encoder | Mean-Dice | Mean-IoU |
| --- | --- | --- |
| Ctranspath | 0.8463±0.0008671 | 0.7392±0.001350 |
| UNI | 0.8490±0.0001842 | 0.7432±0.0002323 |
| Gigapath | 0.8497±0.0003732 | 0.7443±0.0005910 |
| Conch-V1.5 | 0.8406±0.0006679 | 0.7312±0.0009157 |
| Digepath | 0.8542±0.0004516 | 0.7508±0.0006611 |

**Supplementary Table 32**: Supervised gastric tumor region segmentation (STESD-S). Pre-extracted patch features from each encoder were trained and evaluated using TransUnet. The dataset was divided into training, validation, and test sets (3,120:445:890 ROIs). Performance on the test set was assessed using Mean-Dice and Mean-IoU.

| Encoder | Balanced ACC | Weighted F1 | AUROC |
| --- | --- | --- | --- |
| Ctranspath | 0.5379±0.1020 | 0.5754±0.08388 | 0.8223±0.03753 |
| UNI | 0.5845±0.06696 | 0.5977±0.02451 | 0.8095±0.06070 |
| Gigapath | 0.6497±0.05902 | 0.6197±0.05896 | 0.8484±0.03571 |
| Conch-V1.5 | 0.6033±0.06398 | 0.5761±0.07889 | 0.8454±0.04142 |
| Digepath | 0.6846±0.05407 | 0.6941±0.05291 | 0.8599±0.03410 |

**Supplementary Table 33**: Weakly-supervised gastric cancer staging prediction (STM-TNM). Pre-extracted patch features from each encoder were trained and evaluated using ABMIL. The dataset was divided into training, validation, and test sets (192:48:60 WSIs). Performance on the test set was assessed using balanced accuracy, weighted F1 score, and AUROC.

| Encoder | Balanced ACC | Weighted F1 | AUROC |
| --- | --- | --- | --- |
| Ctranspath | 0.6089±0.05769 | 0.5869±0.04909 | 0.8183±0.03062 |
| UNI | 0.6152±0.02948 | 0.5977±0.03388 | 0.8252±0.02985 |
| Gigapath | 0.6368±0.03710 | 0.6094±0.03125 | 0.8361±0.02634 |
| Conch-V1.5 | 0.5706±0.07666 | 0.5494±0.06264 | 0.8104±0.03089 |
| Digepath | 0.6424±0.03525 | 0.6346±0.02138 | 0.8341±0.02441 |

**Supplementary Table 34**: Weakly-supervised Colorectal cancer staging prediction (BOW-TNM). Pre-extracted patch features from each encoder were trained and evaluated using ABMIL. The dataset was divided into training, validation and test sets (637:159:199 WSIs). Performance on the test set was assessed using balanced accuracy, weighted F1 score, and AUROC.

| Encoder | Balanced ACC | Weighted F1 | AUROC |
| --- | --- | --- | --- |
| Ctranspath | 0.9159±0.02330 | 0.9172±0.02580 | 0.9666±0.02029 |
| UNI | 0.9850±0.008909 | 0.9860±0.008113 | 0.9989±0.001588 |
| Gigapath | 0.9610±0.02754 | 0.9585±0.02951 | 0.9959±0.007806 |
| Conch-V1.5 | 0.9520±0.02517 | 0.9554±0.02261 | 0.9891±0.01492 |
| Digepath | 0.9916±0.01685 | 0.9923±0.01542 | 0.9976±0.004891 |

**Supplementary Table 35**: Weakly-supervised differentiation between poorly differentiated adenocarcinoma and poorly differentiated squamous cell carcinoma classification (LA-LS). Pre-extracted patch features from each encoder were trained and evaluated using ABMIL. The dataset was divided into training, validation and test sets (246:61:77 WSIs). Performance on the test set was assessed using balanced accuracy, weighted F1 score, and AUROC.

| Encoder | Balanced ACC | Weighted F1 | AUROC |
| --- | --- | --- | --- |
| Ctranspath | 0.8219±0.03919 | 0.8326±0.03041 | 0.9364±0.01871 |
| UNI | 0.8764±0.03732 | 0.8795±0.03859 | 0.9707±0.02104 |
| Gigapath | 0.8737±0.02985 | 0.8743±0.03495 | 0.9602±0.01891 |
| Conch-V1.5 | 0.8205±0.05545 | 0.8242±0.05491 | 0.9409±0.02497 |
| Digepath | 0.8852±0.09704 | 0.8900±0.09220 | 0.9643±0.02949 |

**Supplementary Table 36**: Weakly-supervised precancerous lesions and reactive hyperplasia classification (LHN-3cls). Pre-extracted patch features from each encoder were trained and evaluated using ABMIL. The dataset was divided into training and test sets (296:74:92 WSIs). Performance on the test set was assessed using balanced accuracy, weighted F1 score, and AUROC.

| Encoder | Balanced ACC | Weighted F1 | AUROC |
| --- | --- | --- | --- |
| Ctranspath | 0.9639±0.01637 | 0.9634±0.01748 | 0.9936±0.004585 |
| UNI | 0.9669±0.02114 | 0.9663±0.02114 | 0.9943±0.005934 |
| Gigapath | 0.9665±0.01912 | 0.9663±0.01947 | 0.9950±0.006192 |
| Conch-V1.5 | 0.9789±0.01388 | 0.9790±0.01350 | 0.9986±0.001378 |
| Digepath | 0.9922±0.01035 | 0.9923±0.01026 | 0.9934±0.009285 |

**Supplementary Table 37**: Weakly-supervised differentiation between signet-ring cell carcinoma and histiocytes classification (R-X). Pre-extracted patch features from each encoder were trained and evaluated using ABMIL. The dataset was divided into training, validation and test sets (246:61:77 WSIs). Performance on the test set was assessed using balanced accuracy, weighted F1 score, and AUROC.

| Encoder | Balanced ACC | Weighted F1 | AUROC |
| --- | --- | --- | --- |
| Ctranspath | 0.6892±0.07644 | 0.7102±0.05944 | 0.7499±0.08042 |
| UNI | 0.7119±0.05045 | 0.7325±0.06232 | 0.7749±0.06805 |
| Gigapath | 0.7314±0.06764 | 0.7570±0.06681 | 0.7913±0.06795 |
| Conch-V1.5 | 0.6954±0.02416 | 0.7250±0.03091 | 0.7666±0.04892 |
| Digepath | 0.7483±0.09522 | 0.7773±0.09245 | 0.7920±0.08288 |

**Supplementary Table 38**: Weakly-supervised PD-L1 prediction. Pre-extracted patch features from each encoder were trained and evaluated using ABMIL. The dataset was divided into training, validation and test sets (479:121:151 WSIs). Performance on the test set was assessed using balanced accuracy, weighted F1 score, and AUROC.

| Encoder | Balanced ACC | Weighted F1 | AUROC |
| --- | --- | --- | --- |
| Ctranspath | 0.7260±0.06616 | 0.7644±0.05811 | 0.8126±0.07684 |
| UNI | 0.7300±0.06833 | 0.8120±0.05401 | 0.8106±0.07452 |
| Gigapath | 0.7507±0.03519 | 0.8289±0.02901 | 0.8355±0.05531 |
| Conch-V1.5 | 0.6850±0.05980 | 0.7577±0.03014 | 0.7561±0.09262 |
| Digepath | 0.8327±0.1370 | 0.8711±0.1089 | 0.8694±0.1103 |

**Supplementary Table 39**: Weakly-supervised HER2 prediction. Pre-extracted patch features from each encoder were trained and evaluated using ABMIL. The dataset was divided into training, validation and test sets (255:64:80 WSIs). Performance on the test set was assessed using balanced accuracy, weighted F1 score, and AUROC.

| Encoder | Balanced ACC | Weighted F1 | AUROC |
| --- | --- | --- | --- |
| Ctranspath | 0.6210±0.03077 | 0.6172±0.03049 | 0.6541±0.02320 |
| UNI | 0.6983±0.06462 | 0.6956±0.06458 | 0.7541±0.07205 |
| Gigapath | 0.6972±0.04970 | 0.6964±0.05023 | 0.7839±0.05995 |
| Conch-V1.5 | 0.6827±0.02572 | 0.6802±0.02673 | 0.7494±0.03930 |
| Digepath | 0.7223±0.08383 | 0.7209±0.08434 | 0.7895±0.08649 |

**Supplementary Table 40**: Weakly-supervised P53 prediction. Pre-extracted patch features from each encoder were trained and evaluated using ABMIL. The dataset was divided into training, validation and test sets (454:114:142 WSIs). Performance on the test set was assessed using balanced accuracy, weighted F1 score, and AUROC.

| Encoder | Balanced ACC | Weighted F1 | AUROC |
| --- | --- | --- | --- |
| Ctranspath | 0.826±0.009564 | 0.8361±0.01299 | 0.9095±0.01548 |
| UNI | 0.8758±0.01135 | 0.8871±0.01206 | 0.9396±0.01244 |
| Gigapath | 0.853±0.007707 | 0.8583±0.01366 | 0.9323±0.01457 |
| Conch-V1.5 | 0.8125±0.03502 | 0.8215±0.03291 | 0.8878±0.02539 |
| Digepath | 0.8841±0.01774 | 0.9015±0.01296 | 0.9507±0.01367 |

**Supplementary Table 41**: Weakly-supervised MSI prediction. Pre-extracted patch features from each encoder were trained and evaluated using ABMIL. The dataset was divided into training, validation and test sets (582:194:194 WSIs). Performance on the test set was assessed using balanced accuracy, weighted F1 score, and AUROC.

| Encoder | Balanced ACC | Weighted F1 | AUROC |
| --- | --- | --- | --- |
| Ctranspath | 0.5339±0.02507 | 0.6333±0.03087 | 0.6363±0.03586 |
| UNI | 0.5705±0.02551 | 0.6570±0.01710 | 0.5980±0.02375 |
| Gigapath | 0.5746±0.06060 | 0.6653±0.05396 | 0.6273±0.07218 |
| Conch-V1.5 | 0.5854±0.03331 | 0.6590±0.03854 | 0.6188±0.05550 |
| Digepath | 0.6304±0.05457 | 0.7131±0.03772 | 0.6561±0.06038 |

**Supplementary Table 42**: Weakly-supervised TCGA-COAD-MUC16 prediction. Pre-extracted patch features from each encoder were trained and evaluated using ABMIL. The dataset was divided into training and test sets (258:64:81 WSIs). Performance on the test set was assessed using balanced accuracy, weighted F1 score, and AUROC.

| Encoder | Balanced ACC | Weighted F1 | AUROC |
| --- | --- | --- | --- |
| Ctranspath | 0.5684±0.02528 | 0.5620±0.02952 | 0.6201±0.03934 |
| UNI | 0.5736±0.02481 | 0.5693±0.02166 | 0.6061±0.05699 |
| Gigapath | 0.5718±0.03834 | 0.5642±0.03405 | 0.6115±0.05482 |
| Conch-V1.5 | 0.5816±0.02886 | 0.5746±0.03506 | 0.5908±0.04492 |
| Digepath | 0.6037±0.02914 | 0.5925±0.03136 | 0.6237±0.05112 |

**Supplementary Table 43**: Weakly-supervised TCGA-COAD-TTN prediction. Pre-extracted patch features from each encoder were trained and evaluated using ABMIL. The dataset was divided into training, validation and test sets (258:64:81 WSIs). Performance on the test set was assessed using balanced accuracy, weighted F1 score, and AUROC.

| Encoder | Balanced ACC | Weighted F1 | AUROC |
| --- | --- | --- | --- |
| Ctranspath | 0.4705±0.04343 | 0.3975±0.04613 | 0.4367±0.04935 |
| UNI | 0.4647±0.06042 | 0.4272±0.08045 | 0.4292±0.06014 |
| Gigapath | 0.4471±0.05840 | 0.4209±0.07391 | 0.4443±0.08802 |
| Conch-V1.5 | 0.4855±0.04935 | 0.4644±0.03903 | 0.4363±0.07123 |
| Digepath | 0.4652±0.05965 | 0.4450±0.06160 | 0.4621±0.1374 |

**Supplementary Table 44**: Weakly-supervised TCGA-READ-TTN prediction. Pre-extracted patch features from each encoder were trained and evaluated using ABMIL. The dataset was divided into training, validation and test sets (82:20:26 WSIs). Performance on the test set was assessed using balanced accuracy, weighted F1 score, and AUROC.

| Encoder | Balanced ACC | Weighted F1 | AUROC |
| --- | --- | --- | --- |
| Ctranspath | 0.5000±0.0000 | 0.8270±0.003246 | 0.4320±0.1097 |
| UNI | 0.4909±0.01818 | 0.8195±0.01881 | 0.3640±0.09134 |
| Gigapath | 0.4909±0.01818 | 0.8195±0.01881 | 0.3692±0.06518 |
| Conch-V1.5 | 0.5000±0.0000 | 0.8270±0.003246 | 0.3831±0.1686 |
| Digepath | 0.4866±0.01809 | 0.8156±0.01814 | 0.6055±0.1477 |

**Supplementary Table 45**: Weakly-supervised TCGA-READ-NRAS prediction. Pre-extracted patch features from each encoder were trained and evaluated using ABMIL. The dataset was divided into training, validation and test sets (82:20:26 WSIs). Performance on the test set was assessed using balanced accuracy, weighted F1 score, and AUROC.

| Encoder | TCGA-COAD | TCGA-READ |
| --- | --- | --- |
| Ctranspath | 0.6748±0.0345 | 0.5885±0.1430 |
| UNI | 0.6420±0.0590 | 0.5732±0.1217 |
| Gigapath | 0.6799±0.0574 | 0.5910±0.2395 |
| Conch-V1.5 | 0.6802±0.0844 | 0.5575±0.1591 |
| Digepath | 0.7182±0.1048 | 0.5988±0.1507 |

**Supplementary Table 46**: Weakly-supervised TCGA-COAD and TCGA-READ survival analysis. Pre-extracted patch features from each encoder were trained and evaluated using ABMIL. The dataset was divided into training, validation and test sets (261:65:82 WSIs for COAD and 98:24:31 WSIs for READ). Performance on the test set was assessed using C-Index.

| Cohort | Total number | Total positives | False negatives | Total negatives | False positives |
| --- | --- | --- | --- | --- | --- |
| NC | 1,079 | 34 | 0 | 1,045 | 141 |
| SX | 1,297 | 22 | 0 | 1,275 | 47 |
| CG | 1,192 | 18 | 0 | 1,172 | 114 |
| SZT | 1,392 | 31 | 0 | 1,361 | 89 |
| ZN | 1,364 | 112 | 0 | 1,252 | 89 |
| NB | 1,111 | 77 | 0 | 1,034 | 205 |
| LZ | 1,512 | 55 | 1 | 1,457 | 121 |
| LG | 826 | 24 | 0 | 802 | 149 |
| FJ | 1,451 | 284 | 1 | 1,167 | 175 |
| Total | 11,224 | 657 | 2 | 10,565 | 1,130 |

**Supplementary Table 47**: Data distribution of the early cancer screening module across nine independent centers.

| Cohort | ACC | Sensitivity | Specificity |
| --- | --- | --- | --- |
| NC | 0.8693 | 1.000 | 0.8651 |
| SX | 0.9638 | 1.000 | 0.9631 |
| CG | 0.9044 | 1.000 | 0.9027 |
| SZT | 0.9361 | 1.000 | 0.9346 |
| ZN | 0.9348 | 1.000 | 0.9289 |
| NB | 0.8155 | 1.000 | 0.8017 |
| LZ | 0.9103 | 0.9818 | 0.9170 |
| LG | 0.8196 | 1.000 | 0.8142 |
| FJ | 0.8787 | 0.9965 | 0.8500 |
| Total | 0.8999 | 0.9970 | 0.8930 |

**Supplementary Table 48**: Performance of the early cancer screening module across nine independent centers. Performance on the test set was assessed using ACC, Sensitivity and Specificity.

| Encoder | Balanced ACC | Weighted F1 |
| --- | --- | --- |
| Ctranspath | 0.6123±0.007900 | 0.5957±0.008391 |
| UNI | 0.6229±0.008259 | 0.6068±0.008233 |
| Gigapath | 0.5894±0.008317 | 0.5714±0.008498 |
| Conch-V1.5 | 0.5754±0.008223 | 0.5598±0.008305 |
| Digepath | 0.7407±0.007731 | 0.7262±0.008233 |

**Supplementary Data Table 49**: ProtoNet-based gastric epithelial neoplasia and hyperplasia classification (STLC). Pre-extracted patch features from each encoder were trained and evaluated using Linear-probe. The dataset was divided into training and test sets (8014:3435 ROIs). Performance on the test set was assessed using balanced accuracy, and weighted F1 score.

| Encoder | Balanced ACC | Weighted F1 |
| --- | --- | --- |
| Ctranspath | 0.5507±0.01184 | 0.4939±0.01185 |
| UNI | 0.5895±0.0113 | 0.5170±0.01131 |
| Gigapath | 0.5086±0.01106 | 0.4464±0.01103 |
| Conch-V1.5 | 0.5543±0.01129 | 0.4481±0.01167 |
| Digepath | 0.6721±0.01111 | 0.6302±0.01098 |

**Supplementary Data Table 50**: ProtoNet-based colorectal polyp classification (UNITOPATHO). Pre-extracted patch features from each encoder were trained and evaluated using Linear-probe. The dataset was divided into training and test sets (8014:3435 ROIs). Performance on the test set was assessed using balanced accuracy and weighted F1 score.

| Hyperparameter | Value |
| --- | --- |
| Layers | 24 |
| Heads | 16 |
| Patch size | 16 |
| Head activation | MLP |
| Embedding dimension | 1024 |
| Drop path rate | 0.3 |
| Global crop scale | [0.32, 1.0] |
| Global crop number | 2 |
| Local crop scale | [0.05, 0.32] |
| Local crop number | 8 |
| Partial prediction shape | Block |
| Partial prediction ratio | 0.3 |
| Partial prediction variance | 0.2 |
| Gradient clipping max norm | 3 |
| Normalize last layer | TRUE |
| Shared head | FALSE |
| AdamW β | (0.9, 0.999) |
| Batch size | 128 × 8 |
| Freeze last layer epochs | 1 |
| Warmup epochs | 5 |
| Warmup teacher temp epochs | 30 |
| Max epochs | 100 |
| Learning rate schedule | cosine |
| Learning rate (start) | auto scaling |
| Learning rate (post warmup) | 2.0e-4 |
| Learning rate (final) | 1e-6 |
| Teacher temperature (start) | 0.04 |
| Teacher temperature (final) | 0.07 |
| Teacher momentum (start) | 0.992 |
| Teacher momentum (final) | 1 |
| Weight decay (start) | 0.04 |
| Weight decay (end) | 0.2 |
| Automatic mixed precision | fp16 |

**Supplementary Table 51**: DINOv2 training parameters and model architecture.

| Hyperparameter | Value |
| --- | --- |
| Batch Size | 1 |
| Number of Epochs | 20 |
| Learning Rate | 1e-4 |
| Optimizer | Adam |
| Optimizer - betas | (0.9, 0.999) |
| Optimizer - epsilon | 1e-8 |
| Optimizer - weight_decay | 0 |
| Number of Classes | 2 |
| Dropout Rate | 0.25 |
| Hidden Layer (L) | 512 |
| Attention Mechanism | Gated Attention |
| Loss Function | Cross Entropy Loss |

**Supplementary Table 52**: ROI classifier training parameters and model architecture.
