# Supplementary figures and images for: Subspecialty-Specific Foundation Model for Intelligent Gastrointestinal Pathology
Source: Research Square preprint supplement (doi:10.21203/rs.3.rs-6836189/v1), 2025-06-23

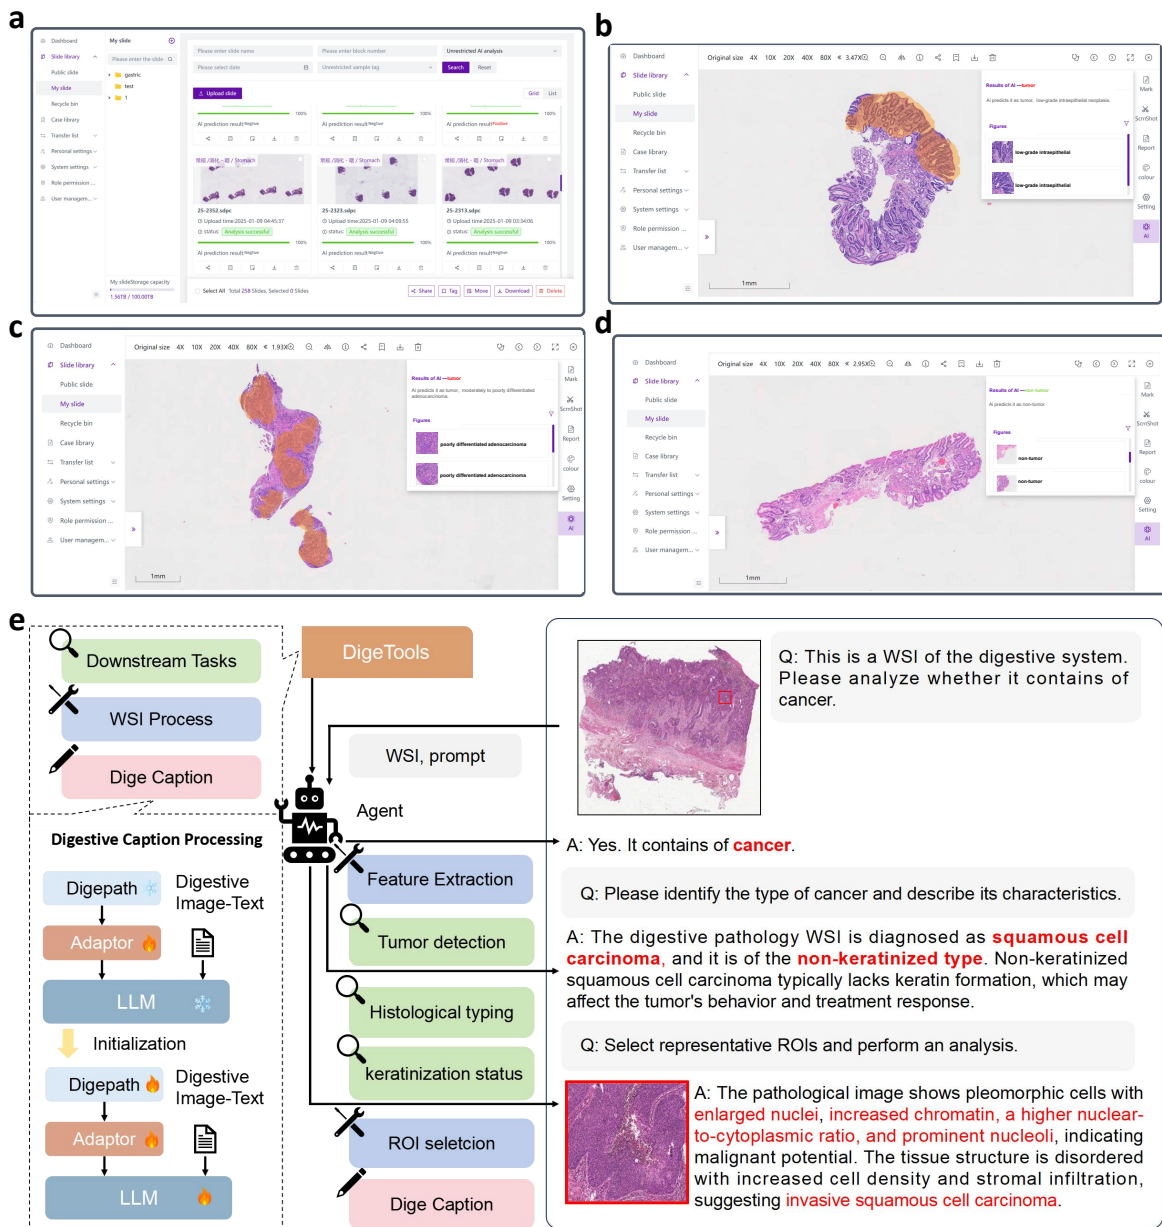

Supplement: Supplementary file 1 [file de58dba3935c9769cd92d77a.pdf]
